# Supplementary material for: Molecular characterization of the first aromatic nutrient transporter from the sodium neurotransmitter symporter family
Source: Oxford University Press journal article supplement (doi:10.1242/jeb.02374), 2006-08-03
Supplement: jeb02374supptables.pdf [file jeb02374supptables.pdf]

Table S1. Splicing scheme and SNPs of *agNAT8* (ENSANGG00000015692) gene

| # | Exon / Intron Chr 3                        | Start                | End                  | Length           | Sequence                                                                                                                                                                                                                                                                                                                                                                                                                                                                                                                                                                                                                                                                                                                                                                                                      |
|---|--------------------------------------------|----------------------|----------------------|------------------|---------------------------------------------------------------------------------------------------------------------------------------------------------------------------------------------------------------------------------------------------------------------------------------------------------------------------------------------------------------------------------------------------------------------------------------------------------------------------------------------------------------------------------------------------------------------------------------------------------------------------------------------------------------------------------------------------------------------------------------------------------------------------------------------------------------|
| 1 | 5' upstream sequence<br>ENSANGE00000062606 | 11089528             | 11090052             | 525 bp           | .....ctgccgaaaagacctggaataaaactttactactctgtctttttccagata<br>aacaacttcttcgcgcaacttcccaactctccaccacacctcagaccATGGAAGGACG<br>GGATAATAAATGGGTTCATCGGGGACAACAGCCCCATCGATAG<br>CGGGCCAGTACCGTTGGACTACACCGGCAGCACCGAATGGA<br>GTTACACGTCACCCACGGAGGACTGGCCCTACTGATGTTGAG<br>CTGGCTGTAGGAGGTAAAAC(a/t)GTCCCCAGACCAACTCCAG<br>CTACAGG(g/a)GAAGATGCGGGACGAGTCCCTACC(c/t)C(c/t)AT<br>AATACCCGAGCCCAATGCCGATCGGGACCAGTGGGGCAAGG<br>GCGTCGAGTTCCTG(a/t)TGTCCTGCATTGCCATGTCGGTCCGG<br>TTGGGCAACGTGTGGCGGTTCCGTTTCGTAGCGCTCGAGAAC<br>GGAGGCGGCGC(a/g)TTCGTGATACCGTACAT(c/t)ATAGTGCT<br>GCTGCTTGTTCGGCAAACCCGCTACTACATGGAGATGA(t/c)C<br>ATCGGACAGTTCTCGAGCCGGGGCAGCGT(a/g)AGGTGTACG<br>ATATGGCACCGATCATGCGAG                                                                                                                   |
| 2 | Intron 1-2<br>ENSANGE00000062603           | 11090053<br>11090650 | 11090649<br>11090878 | 597 bp<br>229 bp | gtaagtggaggcgtccttggactt.....cccttcttctctgacgcgccaag<br>GTGT(t/c)GGTTACGGGCAGCTGTTCTCGGTGACCGCTCTAAT<br>CACGTACTACTCCTCCCTAATGGCAC(t/c)AATTGCACGGTAC<br>ATGATCGAC(t/g)CGTTCATG(a/t)ACCCGCTCCCGGGCCCA<br>CTGTCTGCTCGGAATGGCAACCGAACTGCATCGATTCCGTGG<br>CCGGCAGTGCAAGCCCTAATGACAGCTCATCCAATCGCACA<br>CTGACCAGTAGTT(c/g)GGAGCTTTACTTTAC                                                                                                                                                                                                                                                                                                                                                                                                                                                                          |
| 3 | Intron 2-3<br>ENSANGE00000062605           | 11090879<br>11091034 | 11091033<br>11091149 | 155 bp<br>116 bp | gtaagtttggcgggttcggttta.....ctcactagtctgttacttacag<br>CAAGGT(a/g)GTCCCTGAAGGAGCTGGATGGCATTTGACGATGG<br>AATCGGACTTCCAGATTTGAGACTAACGCTATTCCTGGTCC<br>TATCTTGGTTCGCTCGTGTTCCTCACCTCAT(t/a)AAAG                                                                                                                                                                                                                                                                                                                                                                                                                                                                                                                                                                                                                  |
| 4 | Intron 3-4<br>ENSANGE00000062608           | 11091150<br>11091221 | 11091220<br>11091846 | 71 bp<br>626 bp  | gtaacgaaaactattcttctca.....taaattcgtttcacacctttgcag<br>GTGTTAAAAGCTCCGGCAAAGCCTCTACTTCTTAGCGCTC<br>TTCCCGTACGTCGTCATG(a/g)CGGTGCTGCT(c/t)GTCCGCGC<br>TTG(t/c)ACACT(c/g)CCGGG(c/t)GCAGTGGA(t/c)GGTATCGTGT<br>ACTTCTCAAGCC(g/c)CAGTGGGACAAAATCTACGACCC(a/g<br>)AAGGTGTGGT(a/g)CGCCGCCGTCACGCAGTGCTTCTTCG<br>CTGTCGATCTGCTTCGGCAACATCATCATGTACTCGTCGTAC<br>AACAA(a/g)TTCCGGCACAAATGTGTACCGCGATGCGACGATC<br>GTGACGTTCGATCGATACGTTACGTCGCTGCTGGCCGGGTG<br>TACAATCTTCGGCATACTGGGACATCTGGCACACGTGACGG<br>GGAAGACGGACGTGGGAAATGTGGTGAAATCCGATGCGGG<br>ACTTGCATTTATTCGTACCCGGAAGCGATCGCAAAGTTCG<br>AGGTGCTGCCGCAAGCATTTTCGGTGTCTGTTCTTCTGATGC<br>TGTTTGTGCTCGGCATCGGCAGCAATGTGGCGATGACGTCCG<br>TGCGTGATGACGGTGATAAAGGATCAGTTCGCCGCGGTGCG<br>CAACTGGCAGGC(c/g)GCCACGATATTGCCATCTGTGGCGT<br>GCTGCTCGGTAGCATCTACGTGACGCCG |
| 5 | Intron 4-5<br>ENSANGE00000062609           | 11091847<br>11091919 | 11091918<br>11092195 | 72 bp<br>277 bp  | gtaggtgtttcttagcttctta.....atcctttctcctgctcatttcag<br>GGCGGTCAAGT(a/g)TGTGTTGAAG(C/t)TGGTGGATTATTACGG<br>CGCCTCATCGATCGCGCTCGTGCTTGCCATTGCTGAGCTGAT<br>CGCGATCGGGTGGGTTTA(t/c)GGCGTGGATCGACTGTGCAA<br>GGACACGGAGTTTATGCTTGGCCATCGGCCCAACTGTACT<br>GGCGTCTGTGCTGGCGCTGGATCACGCCCTGCTAATGTTT<br>GTCATTCTCATCTACAACCTTGTACGCTCGAGCCGCTCATG<br>TACA(a/g)GCAGTACGTTTATCCTACGGTCGCTTACG                                                                                                                                                                                                                                                                                                                                                                                                                             |
| 6 | Intron 5-6<br>ENSANGE00000062604           | 11092196<br>11092280 | 11092279<br>11092374 | 84 bp<br>95 bp   | gtgagtatgaccattaagagctaa.....actgctgctgttcatccccgag<br>GCATTGGTTGGTGCATTTTTGCCTTTGGGCT(g/t)CTGCAGCT<br>(c/t)CCGATTTGGGC(g/t)GCCACGCCGCTACAAGCAGAGC<br>GGCAAATCGCT(c/g)AACGAG                                                                                                                                                                                                                                                                                                                                                                                                                                                                                                                                                                                                                                  |
| 7 | Intron 6-7<br>ENSANGE00000062602           | 11092375<br>11092438 | 11092437<br>11092530 | 63 bp<br>93 bp   | gtacggcaccgaaactagctcgc.....ttaactgtttcattattcttttag<br>AAAATTA(a/g)AACGCCTTCAAACCGACCGCTGCCTGGGGT<br>CCGATTGATCCTGCCACGATTACGAGTACAAAAAGTTCAT<br>CGACGAGGACTGA                                                                                                                                                                                                                                                                                                                                                                                                                                                                                                                                                                                                                                               |
|   | 3' downstream sequence                     |                      |                      |                  | ctttagagggaaaccttaaccgggacggtcagcaggttaattctta.....                                                                                                                                                                                                                                                                                                                                                                                                                                                                                                                                                                                                                                                                                                                                                           |

SNPs are shown in parentheses (EMBL prediction/vs./cloned *agNAT8*).

Table S2. Putative post-translational modification sites in the agNAT8 protein along with predicted transmembrane domain (TMD) boundaries

| Putative motif definition                                                  | Start      | Stop       | Length          |
|----------------------------------------------------------------------------|------------|------------|-----------------|
| <b>NH<sub>2</sub></b>                                                      |            |            |                 |
| 1. Proline dependent kinase phosphorylation site                           | 13         | 16         | 4               |
| 2. Myosin 1 heavy chain kinase phosphorylation site                        | 21         | 25         | 5               |
| 3. Proline dependent kinase phosphorylation site                           | 24         | 27         | 4               |
| 4. Casein kinase II phosphorylation site (S or T PO4'D)                    | 41         | 46         | 6               |
| 5. Myosin 1 heavy chain kinase phosphorylation site                        | 54         | 58         | 5               |
| 6. Proline dependent kinase phosphorylation site                           | 56         | 59         | 4               |
| 7. Casein kinase II phosphorylation site (S or T PO4'D)                    | 59         | 64         | 6               |
| <b>TMD1</b>                                                                | <b>84</b>  | <b>111</b> | <b>27_TMD1</b>  |
| <b>TMD2</b>                                                                | <b>115</b> | <b>144</b> | <b>29_TMD2</b>  |
| 8. Protein kinase C phosphorylation site                                   | 142        | 146        | 5               |
| 9. Glycogen synthase kinase 3 phosphorylation site (last S must be PO4 S)  | 142        | 148        | 7               |
| 10. cGMP dependent protein kinase phosphorylation site                     | 143        | 146        | 4               |
| <b>TMD3</b>                                                                | <b>176</b> | <b>212</b> | <b>36_TMD3</b>  |
| 11. Glycogen synthase kinase 3 phosphorylation site (last S must be PO4 S) | 209        | 215        | 7               |
| 12. Proline dependent kinase phosphorylation site                          | 215        | 218        | 4               |
| 13. Casein kinase II phosphorylation site (S or T PO4'D)                   | 215        | 220        | 6               |
| 14. Glycogen synthase kinase 3 phosphorylation site (last S must be PO4 S) | 215        | 221        | 7               |
| <b>1g.</b> Tentative N-glycosylation site                                  | 218        | 221        | NDSS            |
| 15. Protein kinase C phosphorylation site                                  | 221        | 225        | 5               |
| <b>2g.</b> Tentative N-glycosylation site                                  | 223        | 226        | NRTL            |
| 16. Casein kinase II phosphorylation site (S or T PO4'D)                   | 227        | 232        | 6               |
| <b>TMD4</b>                                                                | <b>252</b> | <b>272</b> | <b>20_TMD4</b>  |
| 17. Myosin 1 heavy chain kinase phosphorylation site                       | 254        | 258        | 5               |
| 18 Protein kinase C phosphorylation site                                   | 277        | 281        | 5               |
| <b>TMD5</b>                                                                | <b>280</b> | <b>300</b> | <b>20_TMD5</b>  |
| 19. Glycogen synthase kinase 3 phosphorylation site (last S must be PO4 S) | 277        | 283        | 7               |
| <b>1c.</b> Tentative chaperonin binding epitope                            | 293        | 300        | 8               |
| 20. Tyrosine kinase phosphorylation site                                   | 314        | 323        | 10              |
| <b>TMD6</b>                                                                | <b>324</b> | <b>349</b> | <b>25_TMD6</b>  |
| 21. Consensus sequence for phosphorylation of mannose                      | 347        | 352        | 6               |
| 22. Consensus sequence for phosphorylation of mannose                      | 350        | 355        | 6               |
| 23. Casein kinase II phosphorylation site (S or T PO4'D)                   | 365        | 370        | 6               |
| <b>TMD7</b>                                                                | <b>358</b> | <b>390</b> | <b>32_TMD7</b>  |
| 24. Protein kinase C phosphorylation site                                  | 390        | 394        | 5               |
| 25. Casein kinase II phosphorylation site (S or T PO4'D)                   | 409        | 414        | 6               |
| <b>TMD8</b>                                                                | <b>422</b> | <b>454</b> | <b>32_TMD8</b>  |
| <b>2c.</b> Tentative chaperonin binding epitope                            | 428        | 435        | 8               |
| <b>TMD9</b>                                                                | <b>460</b> | <b>481</b> | <b>21_TMD9</b>  |
| 26. Proline dependent kinase phosphorylation site                          | 480        | 483        | 4               |
| <b>TMD10</b>                                                               | <b>486</b> | <b>512</b> | <b>26_TMD10</b> |
| <b>1n.</b> NADP binding consensus sequence                                 | 494        | 513        | 20              |
| <b>Tmd11</b>                                                               | <b>535</b> | <b>569</b> | <b>34_TMD11</b> |
| 27. Proline dependent kinase phosphorylation site                          | 543        | 546        | 4               |
| 28. Consensus sequence for phosphorylation of mannose                      | 563        | 568        | 6               |
| <b>TMD12</b>                                                               | <b>575</b> | <b>604</b> | <b>29_TMD12</b> |
| 29. Consensus sequence for phosphorylation of mannose                      | 593        | 598        | 6               |
| 30. Protein kinase C phosphorylation site                                  | 599        | 603        | 5               |
| 31. Casein kinase II phosphorylation site (S or T PO4'D)                   | 602        | 607        | 6               |
| 32. Casein kinase II phosphorylation site (S or T PO4'D)                   | 624        | 629        | 6               |
| 33. Consensus sequence for phosphorylation of mannose                      | 628        | 633        | 6               |
| <b>COOH</b>                                                                |            |            |                 |
